# Supplementary material for: Electrogenerated chemiluminescence of triazole-modified deoxycytidine analogues in N,N-dimethylformamide
Source: Royal Society of Chemistry journal article supplement (doi:10.1039/c1cp22116g), 2011-01-01
Supplement: c1cp22116g.pdf [file c1cp22116g.pdf]

Electronic Supplementary Information (EIS)

**Electrogenerated chemiluminescence (ECL) of triazole-modified deoxycytidine analogues in *N,N*-dimethylformamide**

Kalen N. Swanick, David W. Dodd, Jacquelyn T. Price, Allison L. Brazeau, Nathan D. Jones, Robert H.E. Hudson, and Zhifeng Ding\*

*Department of Chemistry, The University of Western Ontario, London, Ontario, Canada, N6A 5B7.*

\*Z.D.: Tel: 1-519-661-21111 x86161; Fax: 1-519-661-3022; Email: zfding@uwo.ca

**Table of contents**

- 1. Cyclic voltammetry and ECL experimental parameters**
- 2. Curve-fitting for ECL spectra**
- 3. Crystallographic details for 1 • 2 H<sub>2</sub>O**

### Cyclic voltammetry and ECL experimental parameters

In annihilation systems, the CV potential window was 2.069 to -1.889 V for **1**, 1.861 to -2.435 V for **2**, 1.787 to -2.231 V for **3**, and 1.828 to -2.940 V for **4**. In coreactant systems, the CV potential window was 0.000 to -2.278 V for **1**, 0.000 to -2.452 V for **2**, 0.000 to -2.517 V for **3**, and 0.000 to -2.126 V for **4**.”

### Curve-fitting for ECL spectra

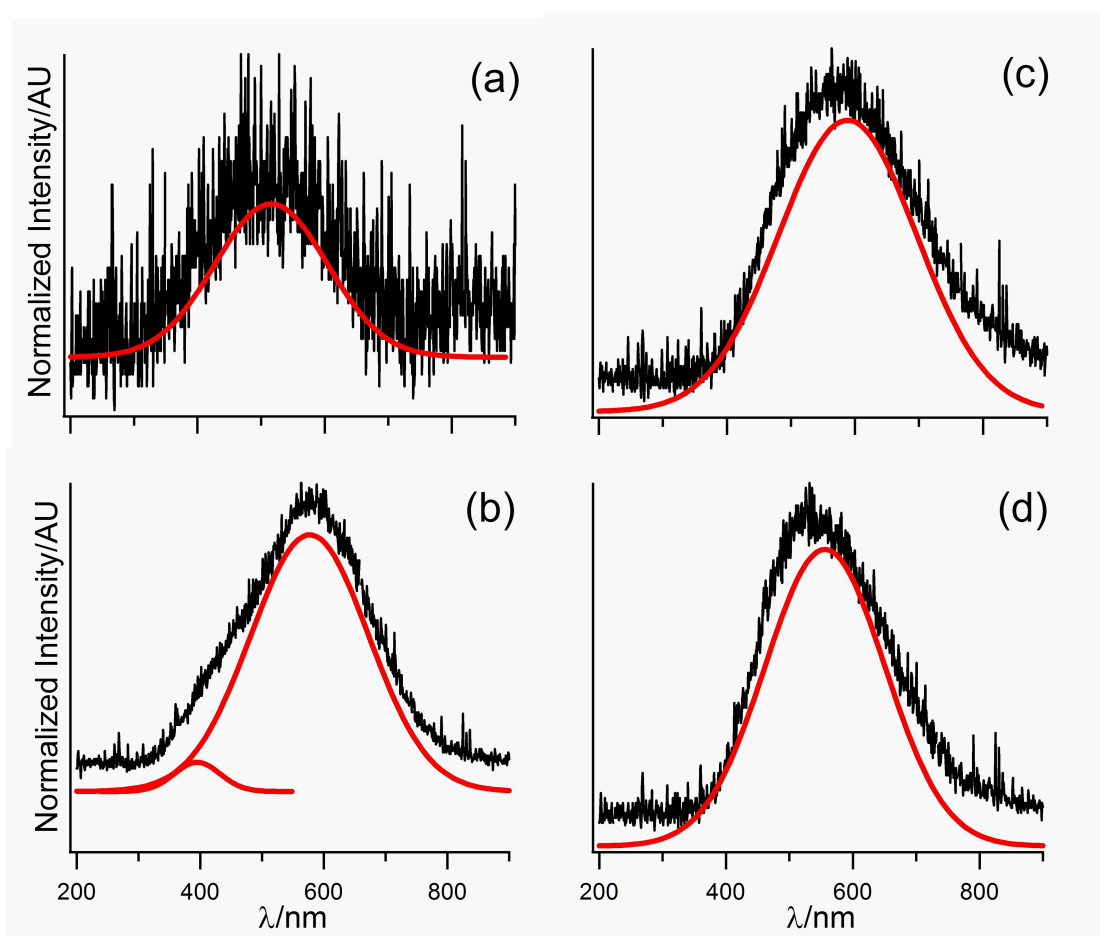

Figure S1. ECL spectra and their curve-fitting for **1-4** in DMF containing  $5.0 \times 10^{-3}$  M BPO and 0.1 M TBAP as supporting electrolyte and pulsing between potential ranges from (a) 0.000 to -2.278 V,  $t = 60$  s for **1**, (b) 0.000 to -2.452 V,  $t = 60$  s for **2**, (c) 0.000 to -2.517 V,  $t = 60$  s for **3**, and (d) 0.000 to -2.126 V,  $t = 60$  s for **4**.

### Crystallographic details for **1** • 2 H<sub>2</sub>O

Crystals of [C<sub>15</sub>H<sub>16</sub>N<sub>6</sub>O<sub>4</sub>S] • 2 H<sub>2</sub>O were grown from a concentrated aqueous solution (refer to Figure S2 for crystal structure of **1**). A colourless needle was mounted on a glass fibre. Data were collected at low temperature (-123°C) on a Nonius Kappa-CCD area detector diffractometer with COLLECT (Nonius B.V., 1997-2002). The unit cell parameters were calculated and refined from the full data set. Crystal cell refinement and data reduction were carried out using HKL2000 DENZO-SMN (Otwinowski & Minor, 1997). The absorption correction was applied using HKL2000 DENZO-SMN (SCALEPACK). The crystal data and refinement parameters for [C<sub>15</sub>H<sub>16</sub>N<sub>6</sub>O<sub>4</sub>S] • 2 H<sub>2</sub>O are listed in Table S1. The reflection data and systematic absences were consistent with an orthorhombic space group: P2(1)2(1)2(1). Bond lengths and angles are listed in Table S2.

The SHELXTL/PC V6.14 for Windows NT (Sheldrick, G.M., 2001) suite of programs was used to solve the structure by direct methods. Subsequent difference Fourier syntheses allowed the remaining atoms to be located. Independent molecules were formed and are interconnected via H-bonding interactions involving the molecule itself and the two water molecules of solvation. All of the non-hydrogen atoms were refined with anisotropic thermal parameters. Some soft restraints were used for the thermal parameters and the disordered thiophene rings. The hydrogen atom positions were calculated geometrically and were included as riding on their respective carbon atoms.

The largest residue electron density peak (0.244 e/Å<sup>3</sup>) was associated with the disordered thiophene ring (Table S1). Full-matrix least squares refinement on F<sup>2</sup> gave R<sub>1</sub> = 5.26 for 2σ data and wR<sub>2</sub> = 11.96 for all data as seen in Table S1 (GOOF = 1.086). The final solution was submitted to the IUCR checkCIF program and had some Alert level A's or B's associated with the lack of complete data.

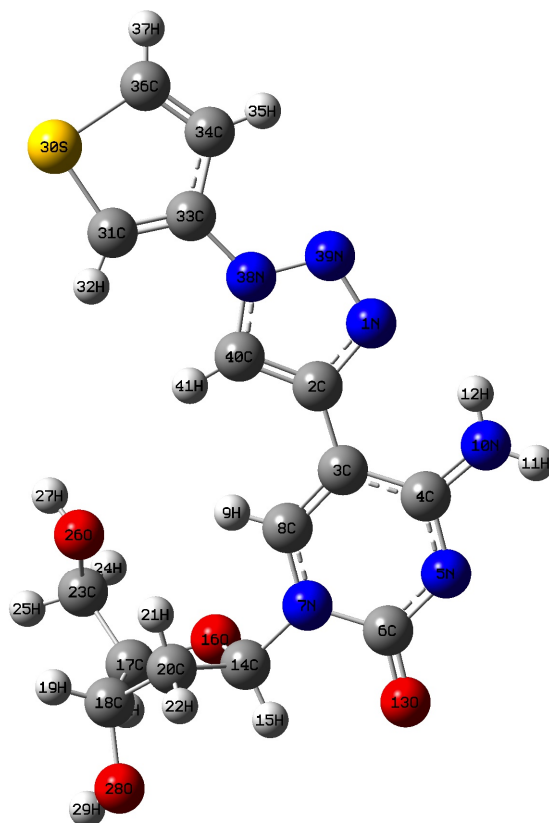

Figure S2: Ball-and-stick representation of **1**. Carbon atoms are in grey, sulfur in yellow, nitrogen in blue, oxygen in red, and hydrogen in white. The final solution was submitted to the IUCR CIF checking program and had some Alert level A's or B's associated with the lack of complete data, however the general structure can be observed for **1**, similar to our previously reported solid state structure of **2**.

Table S1: Crystal data and structure refinement for **1** • 2 H<sub>2</sub>O

|                      |                                                                 |          |
|----------------------|-----------------------------------------------------------------|----------|
| Empirical formula    | C <sub>15</sub> H <sub>20</sub> N <sub>6</sub> O <sub>6</sub> S |          |
| Formula weight       | 412.43                                                          |          |
| Temperature          | 150(2) K                                                        |          |
| Wavelength           | 0.71073 Å                                                       |          |
| Crystal system       | Orthorhombic                                                    |          |
| Space group          | P 2 <sub>1</sub> 2 <sub>1</sub> 2 <sub>1</sub>                  |          |
| Unit cell dimensions | a = 4.8367(6) Å                                                 | a = 90°. |
|                      | b = 12.1128(18) Å                                               | b = 90°. |
|                      | c = 30.967(5) Å                                                 |          |

|                                          |                                                   |          |
|------------------------------------------|---------------------------------------------------|----------|
| Volume                                   | 1814.2(5) Å <sup>3</sup>                          | g = 90°. |
| Z                                        | 4                                                 |          |
| Density (calculated)                     | 1.510 Mg/m <sup>3</sup>                           |          |
| Absorption coefficient                   | 0.227 mm <sup>-1</sup>                            |          |
| F(000)                                   | 864                                               |          |
| Crystal size                             | 0.75 x 0.13 x 0.03 mm <sup>3</sup>                |          |
| Theta range for data collection          | 2.59 to 18.84°.                                   |          |
|                                          | -4<=h<=4, -11<=k<=10, -                           |          |
| Index ranges                             | 27<=l<=27                                         |          |
| Reflections collected                    | 6165                                              |          |
| Independent reflections                  | 1347 [R(int) = 0.0910]                            |          |
| Completeness to $\theta = 18.84^\circ$   | 97.80%                                            |          |
| Absorption correction                    | Semi-empirical from equivalents                   |          |
| Max. and min. transmission               | 0.9943 and 0.8482                                 |          |
| Refinement method                        | Full-matrix least-squares on F <sup>2</sup>       |          |
| Data / restraints / parameters           | 1347 / 366 / 279                                  |          |
| Goodness-of-fit (GOOF) on F <sup>2</sup> | 1.086                                             |          |
| Final R indices [I>2 $\sigma$ (I)]       | R <sub>1</sub> = 0.0526, wR <sub>2</sub> = 0.1052 |          |
| R indices (all data)                     | R <sub>1</sub> = 0.0752, wR <sub>2</sub> = 0.1196 |          |
| Absolute structure parameter             | 0.0(3)                                            |          |
| Largest diff. peak and hole              | 0.244 and -0.211 eÅ <sup>-3</sup>                 |          |

Table S2: Hydrogen bonds for 7 • 2 H<sub>2</sub>O [Å and °]

| D-H...A                | d(D-H)  | d(H...A) | d(D...A)  | <(DHA) |
|------------------------|---------|----------|-----------|--------|
| N(17)-H(17A)...O(41)#1 | 0.88    | 2.54     | 3.261(8)  | 139.5  |
| N(17)-H(17B)...N(8)    | 0.88    | 2.08     | 2.764(10) | 134.4  |
| O(25)-H(25A)...O(31)#2 | 0.84    | 1.98     | 2.813(8)  | 171.4  |
| O(26)-H(26A)...O(18)#3 | 0.84    | 1.82     | 2.625(7)  | 160.8  |
| O(31)-H(31A)...O(26)   | 0.87(4) | 1.90(5)  | 2.724(8)  | 157(9) |
| O(31)-H(31B)...O(41)   | 0.87(4) | 2.59(9)  | 2.778(10) | 93(6)  |
| O(41)-H(41A)...N(13)#2 | 0.88(4) | 2.05(6)  | 2.833(8)  | 147(8) |
| O(41)-H(41B)...O(31)#4 | 0.87(4) | 2.12(5)  | 2.968(9)  | 162(9) |

Symmetry transformations used to generate equivalent atoms:

#1 -x+1,y-1/2,-z+3/2 #2 -x+1,y+1/2,-z+3/2 #3 -x+2,y+1/2,-z+3/2  
 #4 x-1,y,z
